# Supplementary material for: Facile room temperature synthesis of a NiFe2O4-based magnetic covalent organic framework for the extraction of tetracycline residues in environmental water samples prior to HPLC
Source: Royal Society of Chemistry journal article supplement (doi:10.1039/d2ay01226j), 2022-01-01
Supplement: d2ay01226j1.pdf [file d2ay01226j1.pdf]

Electronic Supplementary Information

**Facile room temperature synthesis of NiFe<sub>2</sub>O<sub>4</sub>-based magnetic covalent organic framework for the extraction of tetracycline residues in environment water samples prior to HPLC**

Wanliang Liao,<sup>a</sup> Yang Xu,<sup>a</sup> Dingyun Li,<sup>b</sup> Yixing Ye,<sup>a</sup> Yuhan Ning,<sup>a</sup> Weiping

Wang<sup>\*a</sup> and Ai-jun Wang<sup>c</sup>

<sup>a</sup> College of Chemistry and Life Sciences, Zhejiang Normal University, Jinhua  
321004, China

<sup>b</sup> Hydrological Management Center of Jinhua, Jinhua 321004, China

<sup>c</sup> College of Geography and Environmental Sciences, Zhejiang Normal University,  
Jinhua 321004, China

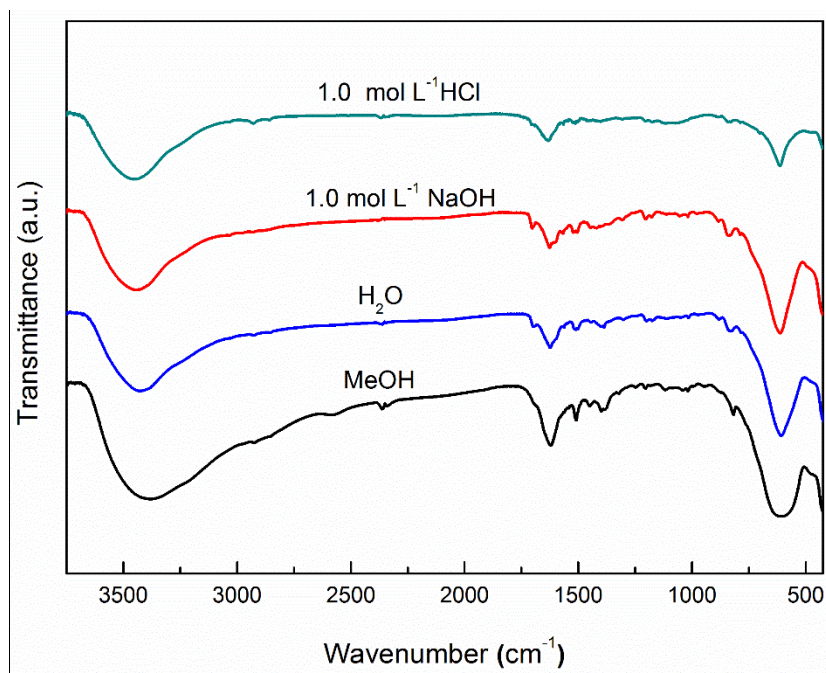

**Fig.S1** FT-IR spectra of  $\text{NiFe}_2\text{O}_4@\text{TAPB-TPA}$  treated with different solvents for 48 h.

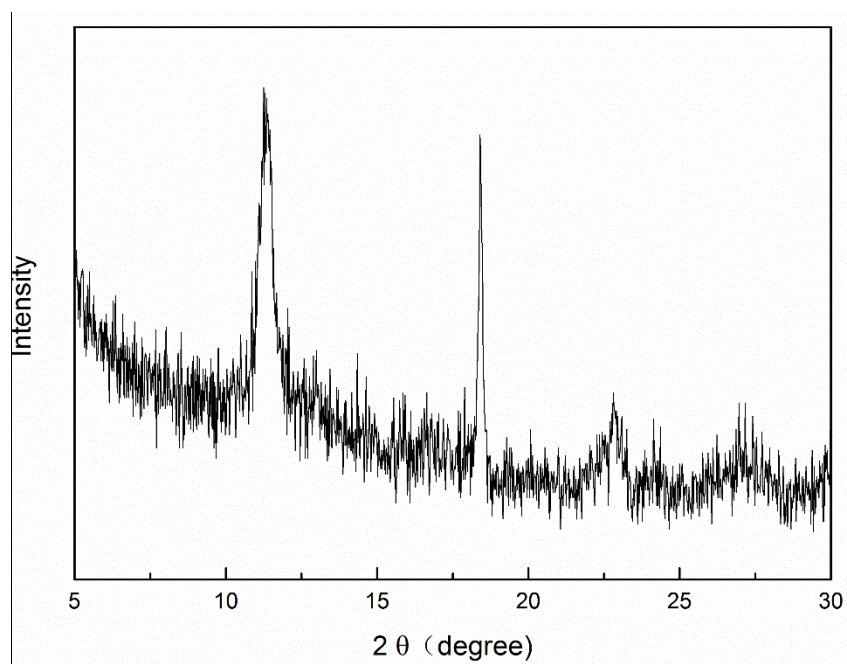

**Fig.S2** Small-angle XRD patterns of  $\text{NiFe}_2\text{O}_4@\text{TAPB-TPA}$ .

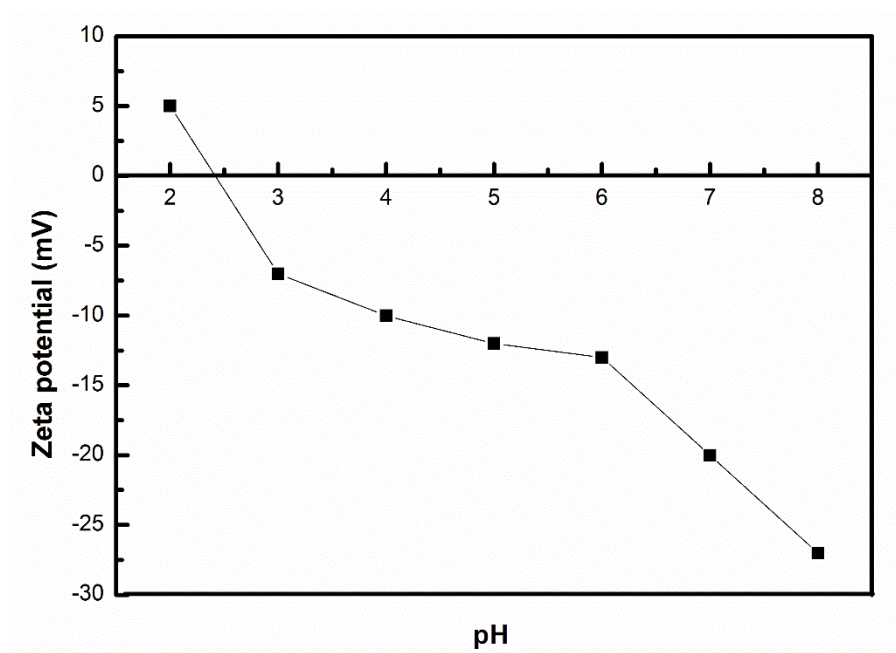

**Fig.S3** Zeta potential of NiFe<sub>2</sub>O<sub>4</sub>@TAPB-TPA.

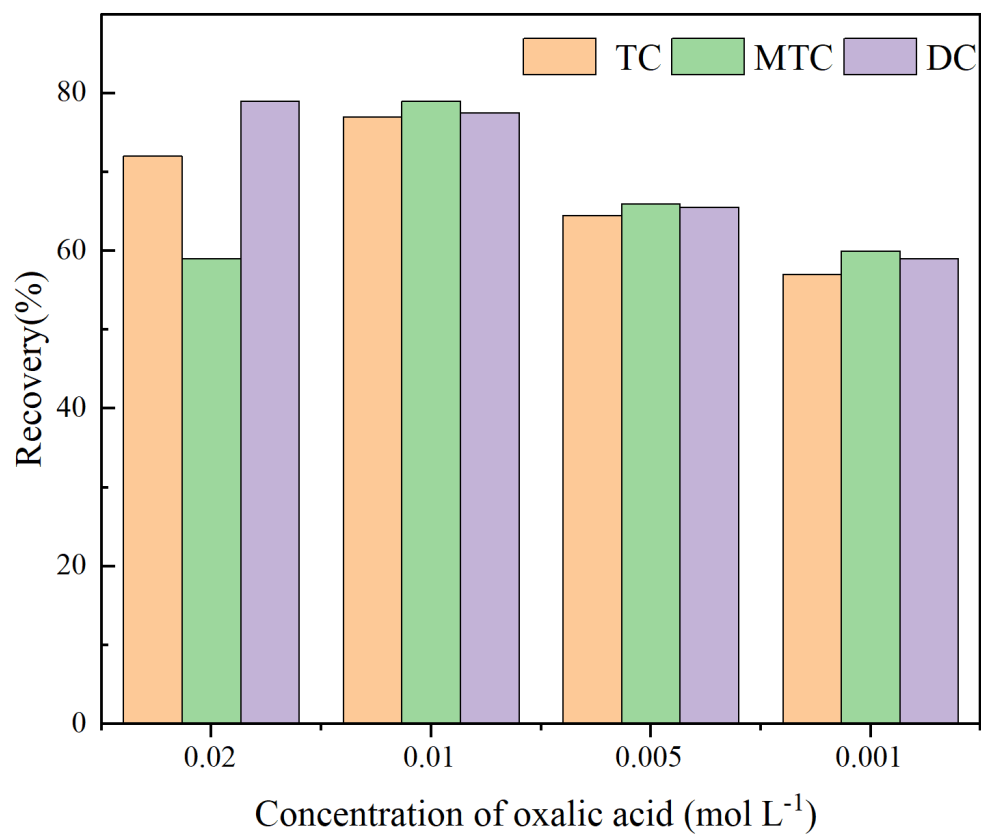

**Fig.S4** Effect of oxalic acid concentration on the extraction recovery. The ratio of MeOH, ACN and oxalic acid was 1:2:7 (v:v:v); other conditions were the same as those in Fig. 4C.

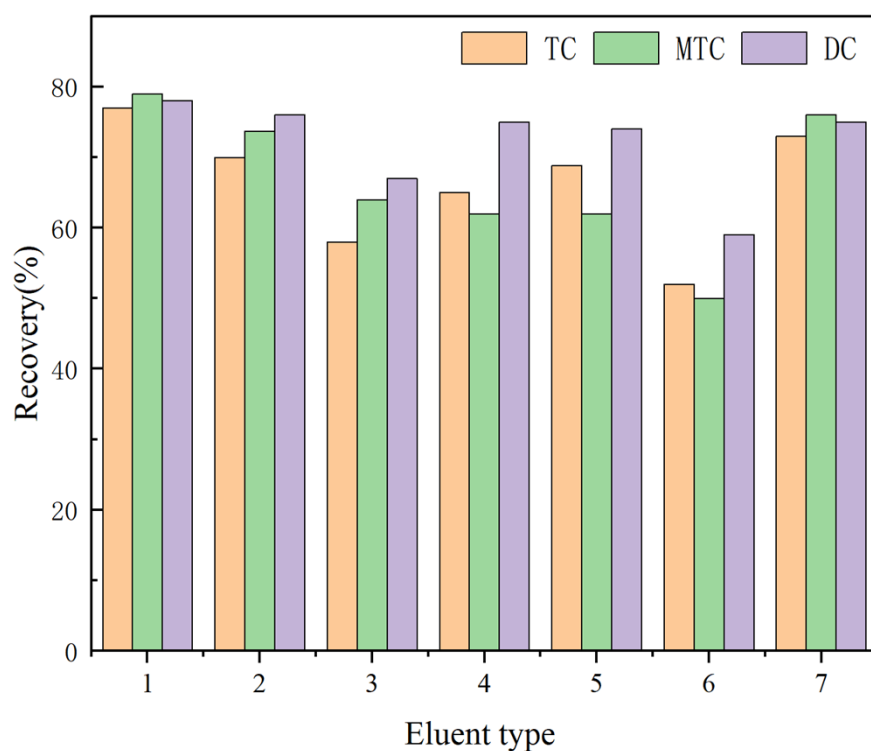

**Fig. S5** Effect of eluent type on extraction recovery. Types of eluent were consisted of MeOH, ACN and oxalic acid ( $0.01 \text{ mol L}^{-1}$ ) at different ratio (v:v:v) : (1) 1:2:7; (2) 2:1:7; (3) 2.5:0.5:7; (4) 1:3:6; (5) 2:2:6; (6) 3:2:5; (7) 1:1:8.

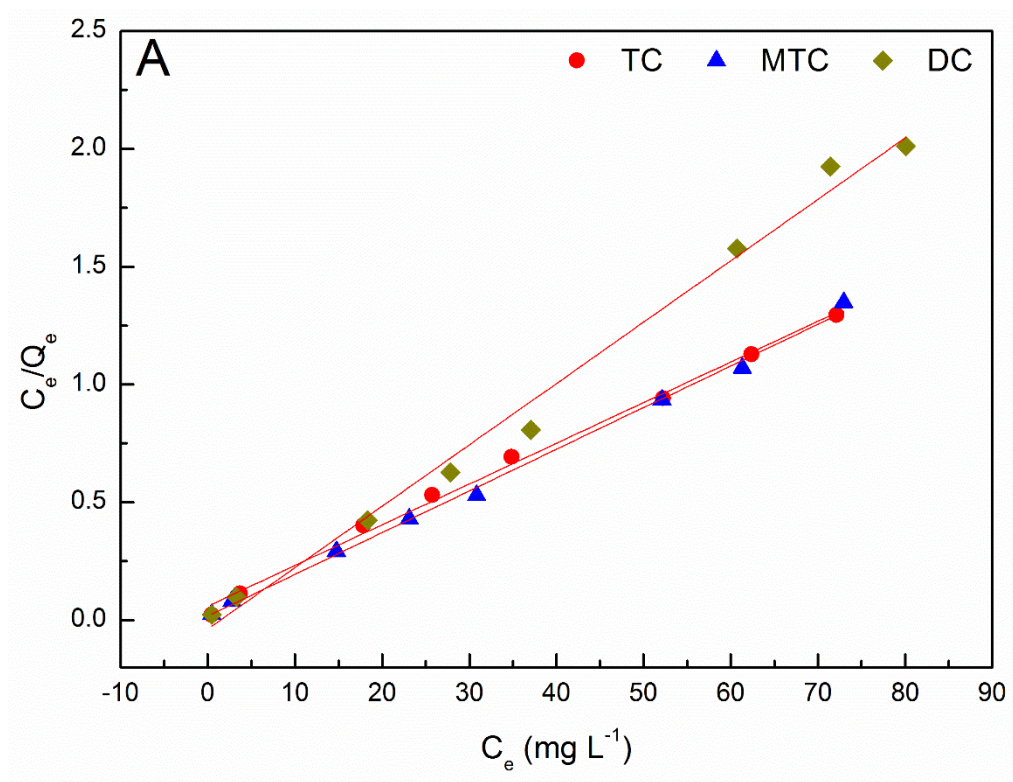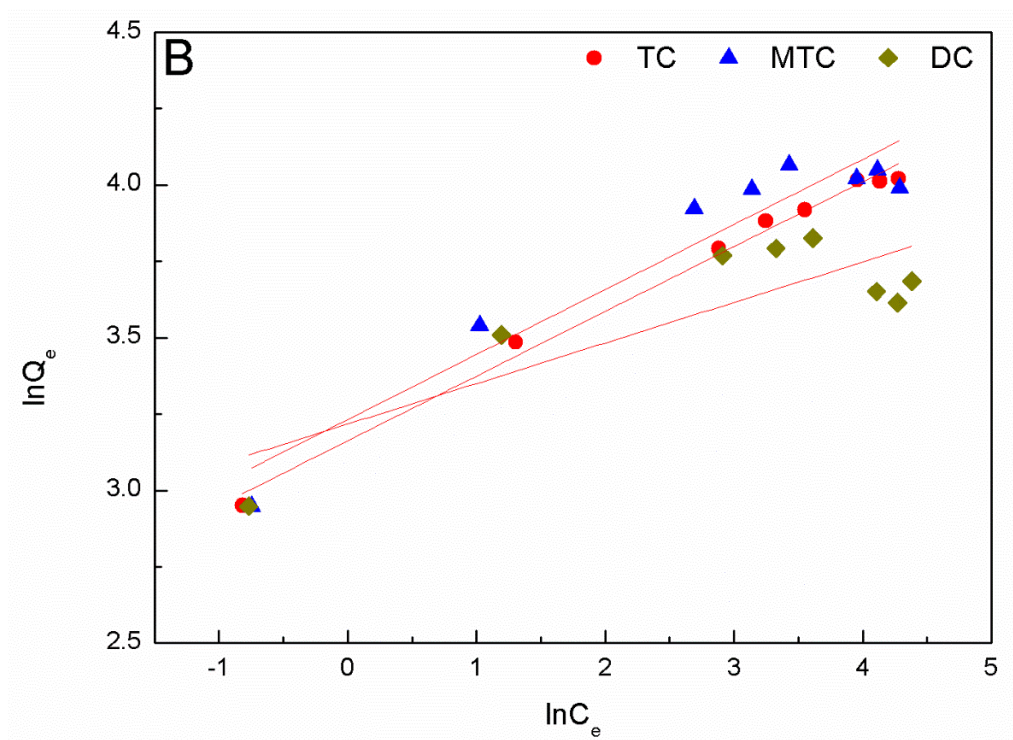

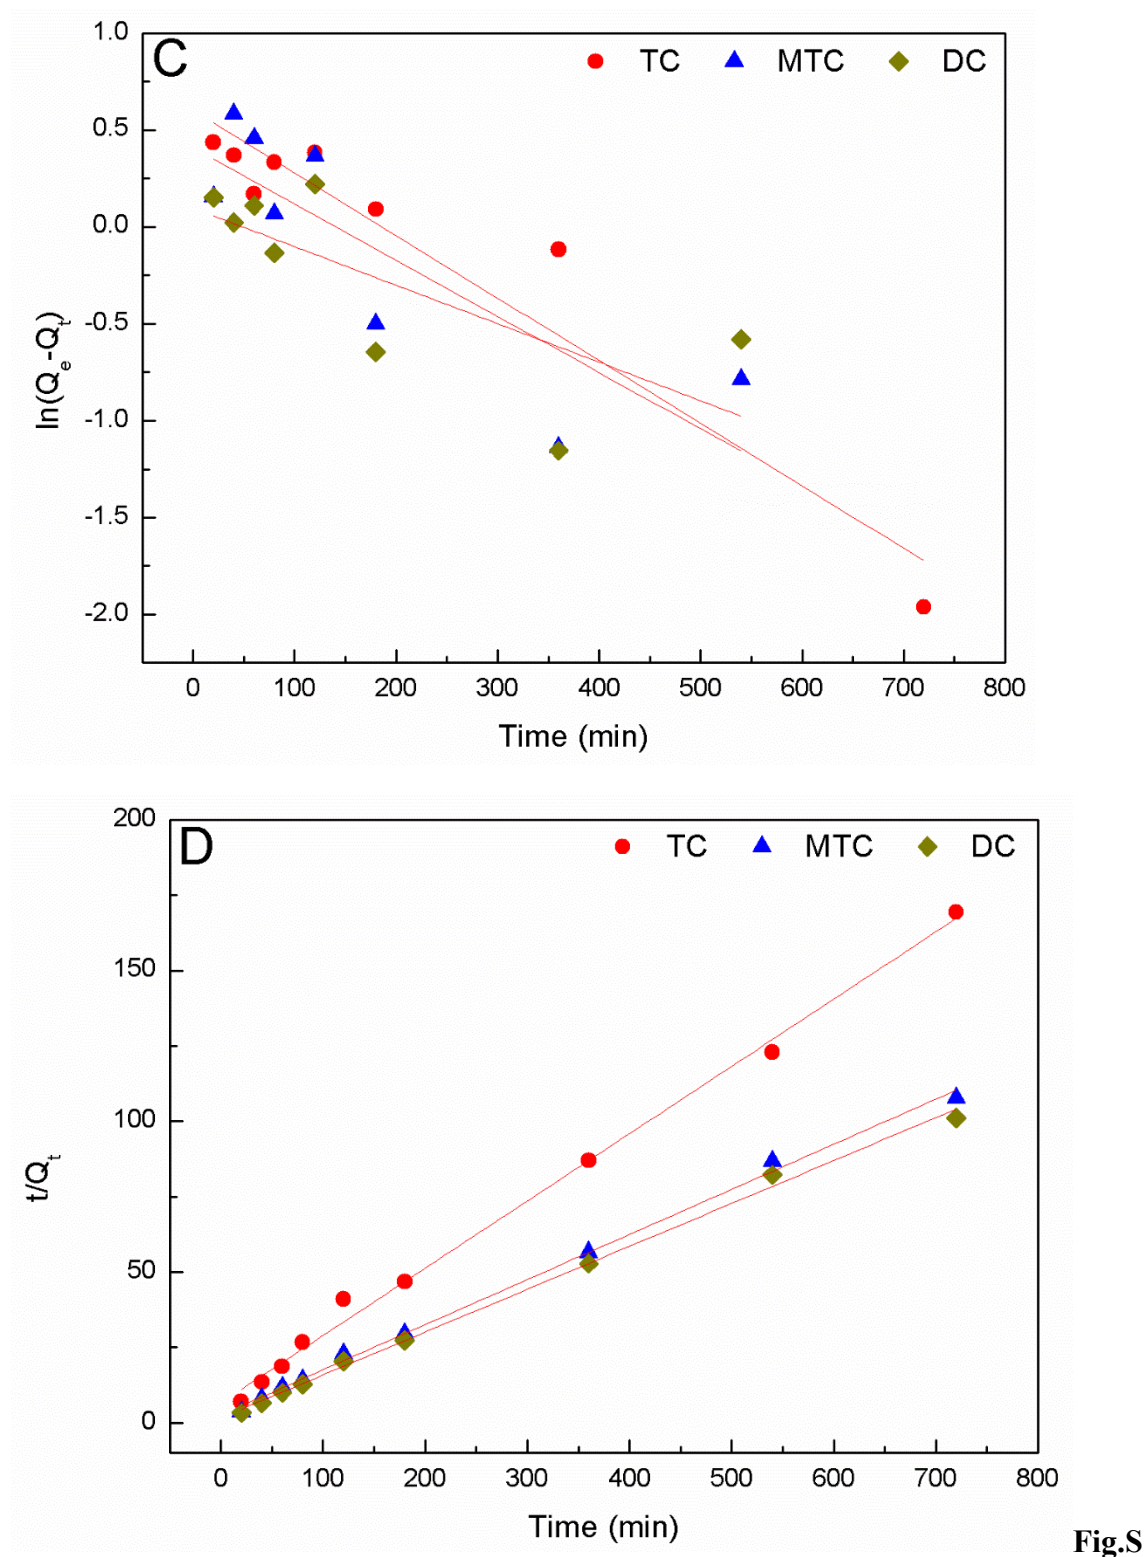

**Fig.S**

**6** Adsorption isotherms and adsorption kinetics of TCs on NiFe<sub>2</sub>O<sub>4</sub>@TAPB-TPA. (A) Langmuir isotherm model curves; (B) Freundlich isotherm model curves; (C) Pseudo-first order model curves; and (D) Pseudo-second order model curves.

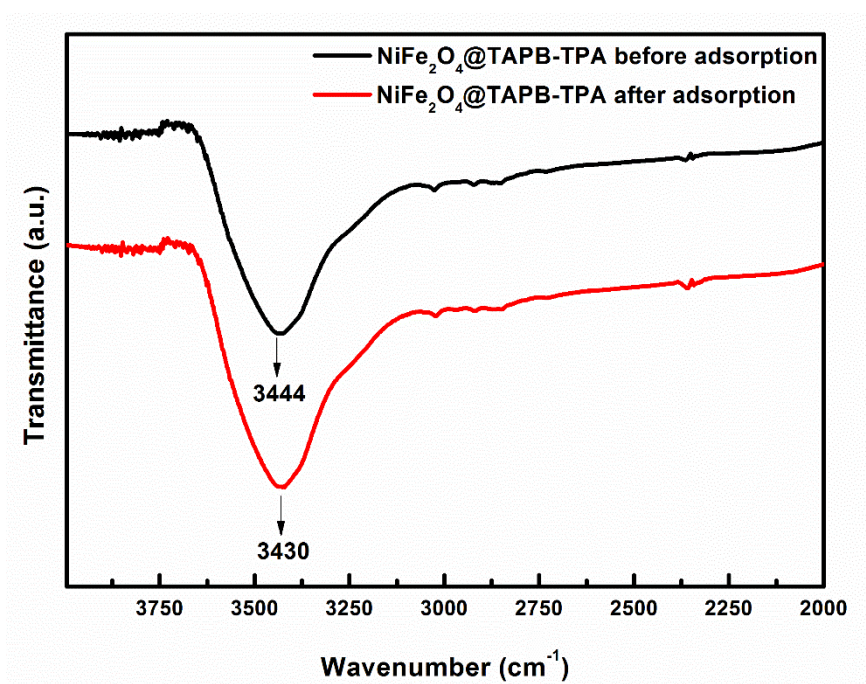

**Fig.S7** The FT-IR spectra of NiFe<sub>2</sub>O<sub>4</sub>@TAPB-TPA before and after adsorption.

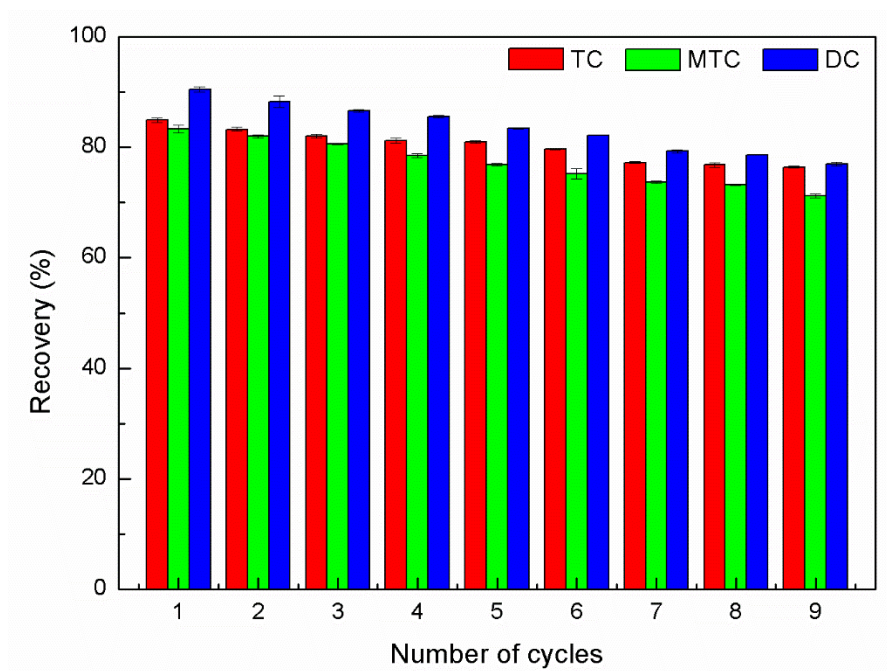

**Fig.S8** Reusability of the  $\text{NiFe}_2\text{O}_4@\text{TAPB-TPA}$  as adsorbent.

## Tables

**Table S1** Some physical-chemical parameters of TCs.

| Analytes     | Abbreviation | Structure                                                                         | Molecular weight | log <sub>K<sub>ow</sub></sub> <sup>a</sup> |
|--------------|--------------|-----------------------------------------------------------------------------------|------------------|--------------------------------------------|
| Tetracycline | TC           | 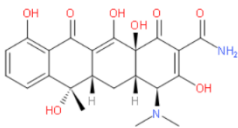 | 444.45           | -1.47                                      |
| Methacycline | MTC          | 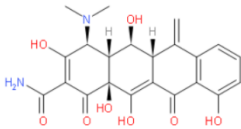 | 442.42           | 0.26                                       |
| Doxycycline  | DC           | 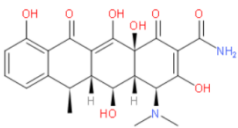 | 444.43           | 0.35                                       |

<sup>a</sup>: log<sub>K<sub>ow</sub></sub>: n-octanol/water partition coefficients, an indicator for hydrophobicity. Data taken from RSC Publishing  
Home: <http://www.chemspider.com>

**Table S2** Results of isothermal models for the adsorption of NiFe<sub>2</sub>O<sub>4</sub>@TAPB-TPA towards TCs.

| Analytes | Langmuir                             |                                        |                | Freundlich     |      |                |
|----------|--------------------------------------|----------------------------------------|----------------|----------------|------|----------------|
|          | K <sub>L</sub> (L mg <sup>-1</sup> ) | Q <sub>max</sub> (mg g <sup>-1</sup> ) | R <sup>2</sup> | K <sub>F</sub> | n    | R <sup>2</sup> |
| TC       | 0.97                                 | 57.87                                  | 0.9956         | 23.63          | 4.72 | 0.9901         |
| MTC      | 3.25                                 | 56.53                                  | 0.9969         | 25.34          | 4.70 | 0.9061         |
| DC       | 1.02                                 | 38.39                                  | 0.9905         | 24.96          | 7.54 | 0.6627         |

**Table S3** Results of kinetic models for adsorption of NiFe<sub>2</sub>O<sub>4</sub>@TAPB-TPA towards TCs.

| TCs | $Q_{e, \text{exp}}$   | Pseudo-first-order model |                       |        | Pseudo-second-order model               |                       |        |
|-----|-----------------------|--------------------------|-----------------------|--------|-----------------------------------------|-----------------------|--------|
|     | (mg g <sup>-1</sup> ) | $K_1$                    | $Q_e$                 | $R^2$  | $K_2$                                   | $Q_e$                 | $R^2$  |
|     |                       | (min <sup>-1</sup> )     | (mg g <sup>-1</sup> ) |        | (g mg <sup>-1</sup> min <sup>-1</sup> ) | (mg g <sup>-1</sup> ) |        |
| TC  | 4.39                  | $3.23 \times 10^{-3}$    | 1.82                  | 0.9046 | $7.44 \times 10^{-3}$                   | 4.48                  | 0.9951 |
| MTC | 6.68                  | $2.90 \times 10^{-3}$    | 1.51                  | 0.6581 | $8.35 \times 10^{-2}$                   | 6.69                  | 0.9972 |
| DC  | 7.12                  | $1.99 \times 10^{-3}$    | 1.10                  | 0.4768 | $1.20 \times 10^{-2}$                   | 7.03                  | 0.9960 |

**Table S4** Comparison of proposed method with reported methods for TCs analysis.

| Sorbent                                    | Method                    | Mass of sorbent (mg) | Linear range ( $\mu\text{g L}^{-1}$ ) | LODs ( $\mu\text{g L}^{-1}$ ) | Recovery (%) | RSD (%)  | Ref       |
|--------------------------------------------|---------------------------|----------------------|---------------------------------------|-------------------------------|--------------|----------|-----------|
| PAN@COF-SCU1 <sup>1</sup>                  | PT-SPE <sup>5</sup> -HPLC | 10                   | 4-70                                  | 0.6-3.0                       | 82.7-117.5   | 1.2-9.5  | 48        |
| RACNTs <sup>2</sup>                        | SPE <sup>6</sup> -HPLC    | 10                   | 50-200                                | 7.5-13.2                      | 46.9-69.6    | 4.0-17.6 | 49        |
| CTP <sub>CC-TP</sub> <sup>3</sup>          | SPE-HPLC                  | 60                   | 26.6–1500                             | 8.0-16.8                      | 81.3–98.7    | 3.9-7.7  | 50        |
| SCAU-1 and SNW-1                           | SPE-UPLC <sup>7</sup>     | 60                   | 1-500                                 | 8.0-16.8                      | 88.4-93.4    | 2.5-4.8  | 51        |
| Oasis HLB <sup>4</sup>                     | SPE-HPLC                  | 200                  | 50-500                                | 17.2-21.0                     | 83.3–111.8   | 3.5-16.2 | 52        |
| NiFe <sub>2</sub> O <sub>4</sub> @TAPB-TPA | MSPE-HPLC                 | 4                    | 1-500                                 | 0.09-0.26                     | 91.6-102.7   | 0.7-4.2  | This work |

<sup>1</sup> polyacrylonitrile@COFs- SCU1, SCU stands for Sichuan University

<sup>2</sup> restricted access carbon nanotubes

<sup>3</sup> microporous covalent triazine-terphenyl polymer

<sup>4</sup> Commercial adsorbent

<sup>5</sup> Pipette tip solid phase extraction

<sup>6</sup> Solid phase extraction

<sup>7</sup> Ultra-performance liquid chromatography
